## **Lipocalin 2 promotes inflammatory breast cancer tumorigenesis and skin invasion**

Emilly S. Villodre<sup>1,10</sup>, Xiaoding Hu<sup>1,10</sup>, Richard Larson<sup>2,10</sup>, Pascal Finetti<sup>3</sup>, Kristen Gomez<sup>4</sup>, Wintana Balema<sup>2,10</sup>, Shane R. Stecklein<sup>2,10</sup>, Ginette Santiago-Sanchez<sup>5</sup>, Savitri Krishnamurthy<sup>6,10</sup>, Juhee Song<sup>7</sup>, Xiaoping Su<sup>8</sup>, Naoto T. Ueno<sup>1,10</sup>, Debu Tripathy<sup>1,10</sup>, Steven Van Laere<sup>9</sup>, Francois Bertucci<sup>3</sup>, Pablo Vivas-Mejía<sup>5</sup>, Wendy A. Woodward<sup>2,10</sup>, Bisrat G. Debeb<sup>1,10</sup>

<sup>1</sup>Department of Breast Medical Oncology, The University of Texas MD Anderson Cancer Center, Houston, TX, USA

<sup>2</sup>Department of Radiation Oncology, The University of Texas MD Anderson Cancer Center, Houston, TX, USA

<sup>3</sup>Laboratory of Predictive Oncology, Aix-Marseille University, Inserm, CNRS, Institut Paoli-Calmettes, CRCM, Marseille, France

<sup>4</sup>Department of Biological Sciences, The University of Texas at Brownsville, Brownsville, TX, USA

<sup>5</sup>Department Biochemistry and Cancer Center, University of Puerto Rico Medical Sciences Campus San Juan, Puerto Rico

<sup>6</sup>Department of Pathology, The University of Texas MD Anderson Cancer Center, Houston, TX, USA

<sup>7</sup>Department of Biostatistics, The University of Texas MD Anderson Cancer Center, Houston, TX, USA

<sup>8</sup>Department of Bioinformatics and Computational Biology, The University of Texas MD Anderson Cancer Center, Houston, TX, USA

<sup>9</sup>Center for Oncological Research (CORE), Integrated Personalized and Precision Oncology Network (IPPON), University of Antwerp

<sup>10</sup>MD Anderson Morgan Welch Inflammatory Breast Cancer Clinic and Research Program, The University of Texas MD Anderson Cancer Center, Houston, TX, USA

\*Corresponding author: Bisrat G. Debeb, DVM PhD, Department of Breast Medical Oncology, Section of Translational Breast Cancer Research, The Morgan Welch Inflammatory Breast Cancer Research Program and Clinic, The University of Texas MD Anderson Cancer Center, 6565 MD Anderson Blvd, Houston, TX 77030. Office phone: 713-792-0696; Lab phone: 713-795-5041; Email: [bgdebeb@mdanderson.org](mailto:bgdebeb@mdanderson.org)

1 **Abstract**

2 Inflammatory breast cancer (IBC) is an aggressive form of primary breast cancer characterized  
3 by rapid onset and high risk of metastasis and poor clinical outcomes. The biological basis for  
4 the aggressiveness of IBC is still not well understood and no IBC-specific targeted therapies  
5 exist. In this study we report that lipocalin 2 (LCN2), a small secreted glycoprotein belonging to  
6 the lipocalin superfamily, is expressed at significantly higher levels in IBC versus non-IBC  
7 tumors, independently of molecular subtype. LCN2 levels were also significantly higher in IBC  
8 cell lines and in their culture media than in non-IBC cell lines. High expression was associated  
9 with poor-prognosis features and shorter overall survival in IBC patients. Depletion of LCN2 in  
10 IBC cell lines reduced proliferation, colony formation, migration, and cancer stem cell  
11 populations in vitro, and inhibited tumor growth, skin invasion, and brain metastasis in mouse  
12 models of IBC. Analysis of our proteomics data showed reduced expression of proteins involved  
13 in cell cycle and DNA repair in LCN2-silenced IBC cells. Our findings support that LCN2  
14 promotes IBC tumor aggressiveness and offer a new potential therapeutic target for IBC.

15

16 **Keywords:** lipocalin 2, LCN2, inflammatory breast cancer, skin invasion, brain metastasis

17

18

## 19 **1. Introduction**

20 Inflammatory breast cancer (IBC) is the most aggressive and deadly variant of primary breast  
21 cancer. Although IBC is considered rare in the United States (1%-4% of all breast cancer  
22 cases), it accounts for a disproportionate 10% of breast cancer-related deaths because of its  
23 aggressive proliferation and metastasis and limited therapeutic options [1-5]. IBC  
24 disproportionately affects young and African American women [1, 6]. IBC is associated with  
25 unique clinical and biological features and a distinctive pattern of recurrence with high incidence  
26 in central nervous system, lung, and liver as first site of relapse [4, 7, 8]. Even with multimodality  
27 treatment strategies, survival rates for women with IBC are far lower than for those with other  
28 types of breast carcinoma (non-IBC), with estimated 5-year overall survival rates limited to 40%  
29 versus 63% for non-IBC [4, 6-9]. These features underscore the critical need to better define the  
30 mechanisms that drive the aggressive behavior of IBC and to develop novel agents to improve  
31 the overall prognosis for women with IBC. Efforts have been undertaken to identify pathways  
32 and therapeutic targets distinct to IBC and to better elucidate the mechanisms of IBC  
33 aggressiveness [10-15]. However, the molecular and cellular basis for IBC aggressiveness  
34 remains unclear. Identification of specific targets and unraveling the mechanisms of growth and  
35 metastasis of this aggressive disease could lead to improvements in IBC patient survival.

36 Lipocalin 2 (LCN2, also known as neutrophil gelatinase-associated Lipocalin [NGAL],  
37 siderocalin, or 24p3) is a 25-kDa secreted glycoprotein that belongs to the lipocalin superfamily.  
38 LCN2 is known to sequester iron, as it binds siderophore-complexed ferric iron with high affinity,  
39 and has significant roles in immune and inflammatory responses, angiogenesis, cell  
40 proliferation, survival and resistance to anticancer therapies [16-21]. LCN2 has been implicated  
41 in the progression of several types of human tumors, including breast cancer, through several  
42 mechanisms, such as stabilization of MMP-9, sequestration of iron, induction of epithelial-  
43 mesenchymal transition, apoptosis resistance, lymphangiogenesis, and cell cycle arrest [16, 17,  
44 19-26]. Moreover, high LCN2 expression levels have been linked with poorer survival in patients

45 with breast cancer [17, 25, 27, 28]. Little is known regarding the oncogenic role of LCN2 in IBC  
46 tumors.

47 In the present study, we demonstrate that LCN2 was expressed at significantly higher  
48 levels in patients with IBC and that LCN2 promoted tumor growth, skin invasion, and metastasis  
49 in xenograft mouse models of IBC.

50

## 51 **2. Materials and Methods**

### 52 *2.1. Cell lines*

53 The SUM149 cell line was purchased from Asterand (Detroit, MI), and MDA-IBC3 cell line were  
54 generated in Dr. Woodward's lab [29, 30], and cultured in Ham's F-12 media supplemented with  
55 10% fetal bovine serum (FBS) (GIBCO, Thermo Fisher, Carlsbad, CA), 1 µg/mL hydrocortisone  
56 (#H0888, Sigma-Aldrich, St. Louis, MO), 5 µg/mL insulin (#12585014, Thermo Fisher), and 1%  
57 antibiotic-antimycotic (#15240062, Thermo Fisher). HEK293T cells were purchased from the  
58 American Type Culture Collection (Manassas, VA, USA) and cultured in Dulbecco's modified  
59 Eagle's medium (DMEM) supplemented with 10% FBS and 1% penicillin and streptomycin  
60 (#15140122, Invitrogen, Carlsbad, CA, USA). All cell lines were kept at 37°C in a humidified  
61 incubator with 5% CO<sub>2</sub> and were authenticated by short tandem repeat (STR) profiling at the  
62 Cytogenetics and Cell Authentication Core at UT MD Anderson Cancer Center.

63

### 64 *2.2. Lentivirus-mediated knockdown*

65 LCN2 stable knockdown clones were generated in SUM149 or MDA-IBC3 cells by using shRNA  
66 (shLCN2-1: TRCN0000060289 from Sigma-Aldrich; shLCN2-2: RHS4430-200252675 or  
67 shLCN2-3: RHS4430-200246537 from MD Anderson's Functional Genomics Core Facility. The  
68 MISSION(R) pLKO.1-puro Empty Vector (SHC001, Sigma) was used as control (shCtl).  
69 HEK293T cells were transfected with 4.05 µg of target plasmid, pCMV-VSV-G (0.45 µg; #8584,  
70 Addgene;) and pCMV delta R8.2 (3.5 µg, #12263, Addgene) by using Lipofectamine 2000 (Life

71 Technologies) for 24 h. SUM149 and MDA-IBC3 cells were incubated with the supernatant-  
72 containing virus plus 8 µg/mL of polybrene for 24 h. Stable cell lines were selected with 1 µg/mL  
73 of puromycin.

74

### 75 *2.3. RNA isolation and real-time PCR*

76 RNA was isolated by using TRIzol Reagent (Life Technologies) according to the manufacturer's  
77 instructions. The cDNA was obtained with a High Capacity cDNA Reverse Transcription Kit with  
78 RNase Inhibitor (Thermo Fisher Scientific). Real-time PCR was done by using Power SYBR  
79 Green PCR Master Mix (Applied Biosystems) on a 7500 Real-Time PCR system (Applied  
80 Biosystems, Foster City, CA). LCN2 forward primer: 3'-CCACCTCAGACCTGATCCCA-5',  
81 reverse primer: 3'- CCCCTGGAATTGGTTGTCCTG-5'; GAPDH forward primer: 3'-  
82 GAAGGTGAAGGTCGGAGT-5', reverse primer: 3'-GAAGATGGTGATGGGATTTC-5'.

83

### 84 *2.4. ELISA*

85 Human Lipocalin-2/NGAL Quantikine ELISA Kits (#DLCN20, R&D Systems) were used to  
86 measure the levels of LCN2 in the cell lines according to the manufacturer's instructions.  
87 Samples were assayed in duplicate.

88

### 89 *2.5. Western blotting*

90 Cells were lysed in RIPA buffer (Sigma) supplemented with 10 µL/mL phosphatase and 10  
91 µL/mL protease inhibitor cocktail. SDS-PAGE and immunoblotting was carried out as described  
92 elsewhere [29]. The following primary antibodies were used: LCN2 antibody (1:1000,  
93 #MAB1757SP, R&D Systems, Minneapolis, MN, USA) or GAPDH (1:5000, #5174, Cell  
94 Signaling, Danvers, MA, USA) and samples were incubated overnight at 4°C. Secondary  
95 antibodies (1:5000), anti-rat IgG (#HAF005, R&D Systems) and anti-rabbit IgG (#7074, Cell  
96 Signaling), were incubated with the samples for 2 h at room temperature.

97

## 98 *2.6. Proliferation*

99 About 2,500 cells were seeded in triplicate in a 96-well plate. Cell proliferation was measured  
100 every day for up to 72 hours with the CellTiter-Blue assay (#G8080, Promega, Madison, WI)  
101 according to the manufacturer's instructions. Absorbance was recorded at OD595 nm with a  
102 Multifunctional Reader VICTOR X 3 (PerkinElmer, Waltham, MA).

103

## 104 *2.7. Colony-formation assay*

105 About 100 SUM149 or 500 MDA-IBC3 shRNA Control or LCN2-silenced cells were plated in  
106 triplicate in 6-well plates. After 15 days, cells were fixed with methanol for 2 min, and stained  
107 with 0.2 % (w/v) crystal violet for 30 min. Colonies were counted by using GelCount (Oxford  
108 Optoronix, Abingdon, UK).

109

## 110 *2.8. Migration and invasion assay*

111 For the migration assay, 50,000 cells per well (triplicate) were seeded in medium without serum  
112 onto 8- $\mu$ m polypropylene filter inserts in Boyden chambers (Fisher). Medium with 10% FBS was  
113 added onto the well. After 24 h, cells on the bottom of the filter were fixed and stained with  
114 Thermo Scientific Shandon Kwik Diff Stains (Fisher). The invasion assay was done as  
115 described above, except that the 8- $\mu$ m polypropylene filter inserts were coated with Matrigel  
116 (#CB-40234, Corning, USA) and incubated for 24 h. Ten visual fields were randomly chosen  
117 under microscopy and cells were quantified by using ImageJ software (National Institutes of  
118 Health, Bethesda, MD, USA).

119

## 120 *2.9. Mammosphere assay*

121 For primary mammosphere formation, 30,000 SUM149 or MDA-IBC3 control or LCN2  
122 knockdown cells were plated in ULTRALOW attachment 6-well plates (Corning, Inc.) in

123 mammosphere medium (serum-free MEM supplemented with 20 ng/mL of bFGF [Gibco], 20  
124 ng/mL epidermal growth factor [Gibco], B27 1x [Gibco], and gentamycin / penicillin /  
125 streptomycin [Thermo Fisher]). After 7 days, 5 ug/mL of MTT (Sigma-Aldrich) was added for 30  
126 min and the mammospheres were counted by using GelCount (Oxford Optronix). For  
127 secondary mammosphere formation, primary mammospheres were dissociated, counted, and  
128 10,000 cells were plated in the ULTRALOW attachment 6-well plates in mammosphere media  
129 and analyzed after 7 days.

130

### 131 2.10. *CD44/CD24 flow cytometry*

132 About  $2.5 \times 10^5$  cells were suspended in CD24-PE mouse anti-human (#555428, BD  
133 Biosciences) or CD24-BV421 Mouse Anti-Human (#562789, BD Biosciences) and CD44-FITC  
134 mouse anti-human (#555478, BD Biosciences) or CD44-APC Mouse anti Human (#559942, BD  
135 Biosciences) solutions and incubated for 20 min on ice. Cells only, PE/BV421 only, and  
136 FITC/APC only were used as controls to set the gating. Fluorescence was detected by using a  
137 Gallios Flow Cytometer (Beckman Coulter, Brea, CA) at the Flow Cytometry and Cellular  
138 Imaging Core Facility (UT MD Anderson Cancer Center). FlowJo software (Treestar, Ashland,  
139 OR) was used to analyze the data.

140

### 141 2.11. *Kinase Enrichment Analysis*

142 The RPPA data was also used for the phosphoproteomic Analysis using kinase enrichment  
143 analysis (KEA - <https://maayanlab.cloud/kea3/>) [31]. Briefly, the 20 proteins that exhibit the  
144 highest phosphorylation fold change levels in control versus LCN2-silenced cells were analyzed.  
145 Two different analyses were performed using KEA: (1) the differentially phosphorylated proteins  
146 are queried for enrichment of kinase substrates; and (2) the differentially phosphorylated  
147 proteins are queried for enrichment of interacting proteins across 7 databases. The latter  
148 analysis is more general and is not limited to only kinase substrates. Both analyses result in the

149 detection of kinases that are putatively responsible for the observed phosphorylation  
150 differences. Identified proteins by both analyses were mapped onto the STRING network  
151 (<https://string-db.org>) to investigate their mutual interactions.

152

### 153 2.12. *In vivo experiments*

154 Four- to six-week-old female athymic SCID/Beige mice were purchased from Harlan  
155 Laboratories (Indianapolis, IN). All animal experiments were done in accordance with protocols  
156 approved by the Institutional Animal Care and Use Committee of MD Anderson Cancer Center,  
157 and mice were euthanized when they met the institutional criteria for tumor size and overall  
158 health condition. For primary tumor growth, cells were injected into the orthotopic cleared  
159 mammary fat pad of mice as previously described [32]. Briefly,  $5 \times 10^5$  SUM149 shRNA Control /  
160 LCN2 knockdown cells were injected (9 mice / Control; 10 mice / LCN2 KD). Tumor volumes  
161 were assessed weekly by measuring palpable tumors with calipers. Volume (V) was determined  
162 as  $V = (L \times W \times W) \times 0.5$ , with L being length and W width of the tumor. To determine latency,  
163 the first day when palpable tumors appeared was used to plot the graph. For brain metastatic  
164 colonization studies, we followed our lab protocol [33]. Briefly,  $1 \times 10^6$  MDA-IBC3 GFP-labeled  
165 shRNA Control / LCN2 knockdown cells (10 mice/group) were injected via the tail vein into  
166 SCID/Beige mice. At 12 weeks after tail-vein injection, mice were euthanized, and brain tissue  
167 collected and imaged with fluorescent stereomicroscopy (SMZ1500, Nikon Instruments, Melville,  
168 NY). ImageJ was used to measure GFP-positive areas to quantify the area of brain tumor  
169 burden. For mice with more than one brain metastasis, the area of each metastasis was  
170 considered and measured.

171

### 172 2.13. *Statistical analysis*

173 All in vitro experiments were repeated at least three times, and graphs depict mean  $\pm$  SEM.  
174 Statistical significance was determined with Student's *t* tests (unpaired, two-tailed) unless



175 otherwise specified. One-way analysis of variance was used for multiple comparisons. Mann-  
176 Whitney test was used when normality was not met. *LCN2* expression in breast cancer samples  
177 was analyzed in the IBC Consortium dataset [34] for IBC and from a meta-dataset previously  
178 published [35]. Tumor samples were stratified as *LCN2*-high when expression in tumor was at  
179 least 2-fold the mean expression level measured in the normal breast samples; otherwise, the  
180 sample was classified as *LCN2*-low. Kaplan-Meier curves and log-rank tests were used to  
181 compare survival distributions. Univariate and multivariate Cox regression models were used to  
182 evaluate the significance of *LCN2* expression on overall survival. A *p* value of <0.05 was  
183 considered significant. GraphPad software (GraphPad Prism 8, La Jolla, CA) was used.

184

### 185 **3. Results**

#### 186 *3.1. LCN2 mRNA is highly expressed in inflammatory breast cancer*

187 Previous studies have shown that high *LCN2* expression levels were correlated with poor  
188 prognosis in breast cancer patients [17, 25-27]. We further validated these findings by analyzing  
189 a meta-dataset of 8951 breast cancers, in which 87% of tumor samples were classified as  
190 *LCN2*-low and 13% as *LCN2*-high. **Table 1** summarizes the clinico-pathological patient  
191 characteristics stratified by *LCN2* expression status. High expression of *LCN2* was associated  
192 with variables commonly associated with poor outcome: younger patients' age, high grade,  
193 advanced stage tumors (pN-positive and pT3), ductal type, estrogen receptor (ER)-negative  
194 status, progesterone receptor (PR)-negative status, ERBB2-positive status, and aggressive  
195 molecular subtypes (ERBB2+ and triple-negative breast cancer [TNBC] subtypes). In this  
196 cohort, we also analyzed the association of *LCN2* expression and survival over time using the  
197 Kaplan–Meier method. We found that *LCN2*-high tumors had significantly shorter overall  
198 survival ( $p<0.0001$ ) than *LCN2*-low tumors (**Fig.1A**).

199 Analysis of microarray data from the IBC World Consortium Dataset [34] consisting of IBC and  
200 non-IBC patient samples (n=389; IBC=137, non-IBC=252) showed that *LCN2* expression was

201 significantly higher in tumors from IBC patients compared to non-IBC ( $p=0.0003$ ; Fig 1B). We  
202 validated this finding in another independent data set [36] that compared mRNA expression of  
203 micro dissected IBC and non-IBC tumors ( $p=0.0379$ ; Fig 1C). Here too, *LCN2* expression was  
204 higher in ER-negative IBC patients compared to ER-positive ( $p=0.0009$ ; Fig. 1D) and in more  
205 aggressive subtypes, ERBB2-positive and TNBC, compared to hormone receptor (HR)-  
206 positive/ERBB2-negative subtype (Fig. 1E). Multivariate analysis showed that *LCN2* was  
207 expressed significantly higher in IBC tumors relative to non-IBC tumors, independently from the  
208 molecular subtype differences (Odds ratio, 1.71,  $p=0.034$ , Table 2). Here too, the survival  
209 analysis in IBC patients showed that *LCN2*-high tumors had significantly shorter overall survival  
210 ( $p=0.0317$ ) than *LCN2*-low tumors (Fig.1F). Consistent with the patient data, the levels of *LCN2*  
211 were higher in IBC cell lines (Fig. 1G) and in the supernatants collected from IBC cell lines  
212 relative to non-IBC (Fig. 1H).

213 Taken together, our findings show that *LCN2* is highly expressed in IBC tumors and is  
214 correlated with aggressive features and poor outcome suggesting it may contribute to the  
215 aggressive pathobiology of IBC tumors.

216

### 217 3.2. *LCN2 knockdown reduced aggressiveness features in vitro*

218 We generated stable *LCN2* knockdown cell lines [SUM149 (triple-negative IBC); MDA-IBC3  
219 (HER2+ IBC)] to investigate the role of *LCN2* in IBC aggressiveness in vitro and in vivo. *LCN2*  
220 knockdown was confirmed by qRT-PCR and immunoblotting (Fig. 2A,B). Because *LCN2* is a  
221 secreted protein, we evaluated levels of *LCN2* protein in the supernatants from control and  
222 *LCN2*-silenced IBC cell lines by using ELISA. We observed significant reduction of secreted  
223 *LCN2* in the *LCN2*-silenced IBC cells (Fig. 2C). Silencing *LCN2* slightly reduced proliferation of  
224 SUM149 cells but did not affect MDA-IBC3 cells (Fig 2D). Depletion of *LCN2* reduced the  
225 capacity of the cells to form colonies (Fig. 2E) and to migrate and invade (Fig. 3A,B). *LCN2*  
226 silencing also significantly reduced the percentage of cancer stem cell populations in *LCN2*-

227 silenced IBC cells relative to control, as shown by reductions in primary and secondary  
228 mammosphere formation efficiency (Fig. 3C,D) and CD44<sup>+</sup>CD24<sup>-</sup> cell subpopulations (Fig. 3E).  
229 These findings indicate that suppression of LCN2 in IBC cells reduced in vitro aggressiveness  
230 features.

231

### 232 3.3. *Silencing of LCN2 inhibited tumor growth and skin invasion*

233 To investigate the effects of LCN2 on tumor growth and skin invasion, key characteristics of IBC  
234 tumors [4], we injected SUM149 control or LCN2-silenced cells into the cleared mammary fat  
235 pad of SCID/Beige mice. Silencing of LCN2 reduced tumor volumes ( $p=0.0037$ ; Fig. 4A) and  
236 tumor latency, *i.e.* the ability to initiate tumor growth: mice transplanted with SUM149 LCN2-  
237 silenced cells took longer to initiate tumors than did those transplanted with SUM149 control  
238 cells ( $p=0.0145$ , Fig. 4B). Because IBC typically manifests with skin invasion and formation of  
239 tumor emboli [4], we assessed skin invasion visually during primary tumor growth, as evidenced  
240 by loss of fur at the tumor site and skin redness and thickness, and during tumor excision when  
241 tumors were firmly connected with the skin. Analysis of resected tumors showed that  
242 significantly fewer mice with SUM149 LCN2-silenced cells had skin invasion/recurrence  
243 compared with mice implanted with control cells (shLCN2: 2 of 8 mice [25%] vs. shControl: 7 of  
244 8 mice [87.5%],  $p=0.01$ ; Fig. 4C;4D). On histologic examination, tumors generated from LCN2-  
245 silenced cells were more differentiated than those generated from control SUM149 cells (Fig.  
246 4E); we further observed tumor emboli, another hallmark of IBC tumors, in SUM149 control-  
247 transplanted tumors but not in tumors generated from LCN2-silenced SUM149 cells (Fig. 4E).

248 We recently generated xenograft mouse models of brain and lung metastasis via tail-  
249 vein injection of IBC cell lines [29, 33]. We also showed that sublines of SUM149 generated  
250 from brain metastases (BrMS) and lung metastases (LuMS) have distinct morphologic and  
251 molecular features [29]. Microarray profiling of these sublines showed upregulation of *LCN2* in  
252 the brain metastatic sublines (Supplementary Fig. S1A), and we confirmed higher levels of

253 secreted LCN2 in the BrMS sublines versus LuMS by ELISA (**Supplementary Fig. S1B**). Most  
254 recently, Chi et al elegantly demonstrated that LCN2 promotes brain metastatic growth in  
255 mouse models of leptomeningeal metastasis, highlighting a potential brain metastasis-  
256 promoting role for LCN2 [37]. We investigated the functional role of LCN2 in IBC brain  
257 metastasis by using our HER2+ MDA-IBC3 mouse model, which has a high propensity to  
258 metastasize to the brain and has been used to identify targets and develop therapeutics against  
259 brain metastasis [29, 38-40]. We found that the brain metastatic burden was significantly lower  
260 in mice that had received tail-vein injection of LCN2-silenced MDA-IBC3 cells than in mice  
261 injected with control cells (**Fig. 4F**,  $p=0.0059$ ). Also, fewer mice injected with LCN2-silenced  
262 cells developed brain metastasis (1 of 10 [10%]) than did mice injected with control cells (5 of 10  
263 mice [50%]), although this trend was not statistically significant ( $p=0.1409$ ; **Fig. 4G**).  
264 Representative stereofluorescence and hematoxylin and eosin images of brain metastases are  
265 shown in **Fig. 4H**. Overall, our findings suggest that LCN2 may drive IBC tumor progression,  
266 skin invasion/recurrence, and brain metastasis.

267

### 268 3.4. *LCN2 silencing impairs cell cycle-associated proteins*

269 To identify potential mechanisms and pathways involved in suppression of tumor growth and  
270 skin invasion in LCN2-silenced cells, we used reverse phase proteomics assay (RPPA) profiling  
271 to compare control and LCN2-silenced SUM149 cells. Our analysis showed reduced expression  
272 of cell cycle-associated proteins (such as AXL, FOXM1, Chk1, CDK1, Wee1, Aurora-B, and  
273 cyclin-B1 and the mTOR/AKT pathway) in LCN2-silenced IBC cells (**Fig. 5A**). Gene set  
274 enrichment analysis revealed several key signaling pathways that were enriched in the control  
275 cells, including those associated with cell cycling, DNA repair and mTOR signaling (**Fig. 5B**).  
276 Furthermore, we performed kinase enrichment analysis (KEA) [31] on the 20 proteins that  
277 exhibited the highest phosphorylation fold changes in LCN2-control vs. LCN2-silenced SUM149  
278 cells (**Supplementary Table 1**). Based on the set of predicted activated kinases (**Supplementary**

279 **Table 1 and Supplementary Table 2**), an interaction network was generated (**Fig. 5C**). Based on  
280 the node degree distribution (i.e. the distribution of the number of interactions per gene in the  
281 network), MAPK1 (N=10), MAPK8 (N=7), RPS6KB1 (N=7) and MTOR (N=11) appear to be  
282 central to LCN2 action in SUM149 cells. Thus, LCN2 may regulate different pathways, including  
283 cell cycle and mTOR proteins to promote tumor growth in IBC.

284

#### 285 **4. Discussion**

286 Inflammatory breast cancer is an aggressive form of breast cancer with poor survival outcomes.  
287 Although considerable effort has been undertaken to understand the unique biology of IBC,  
288 insights are still limited as to the molecular properties that mediate the development and  
289 aggressiveness of IBC. Herein, we report that the secreted glycoprotein LCN2 was highly  
290 expressed in tumors from IBC patients and in IBC cell lines. We further demonstrate, with in  
291 vitro and in vivo studies, that LCN2 has a tumor promoter function in IBC.

292 LCN2 has been implicated in the progression of several types of human tumors. LCN2  
293 expression is higher in solid tumors than in corresponding normal tissues [24, 41], and it is  
294 mainly described as tumor promoter in many cancers, including pancreas, glioblastoma, thyroid,  
295 kidney, esophagus, and breast cancer [20, 28, 42-48].

296 In breast cancer, increased LCN2 expression was associated with poor outcomes and  
297 shown to be an independent prognostic marker of disease-specific-free survival [27, 48, 49].  
298 LCN2 also correlates with several important unfavorable prognostic factors in breast cancer,  
299 such as hormone-negative status, high proliferation levels, high histologic grade, and the  
300 presence of lymph node metastases [27, 48, 49]. Further, serum levels of LCN2 have been  
301 shown to correlate with cancer progression and higher likelihood of metastasis in breast cancer  
302 [25, 50]. The oncogenic role of LCN2 has been reported in xenograft and LCN2-knockout  
303 mouse models. Disruption of the *LCN2* gene in MMTV-PyMT mice was found to suppress  
304 primary tumor formation without affecting lung metastasis [51]. Using the spontaneous MMTV-

305 *ErbB2*(V664E) LCN2<sup>-/-</sup> mouse model, Leng et al reported delayed tumor growth and reduced  
306 lung metastasis burden in these LCN2<sup>-/-</sup> mice [16]. Another group showed that injection of wild-  
307 type PyMT tumor cells into LCN2-deficient mice did not alter primary tumor formation but did  
308 significantly reduce lung metastasis [52]. LCN2 has also been shown to promote tumor  
309 progression in xenograft mouse models [17, 25]. Consistent with these studies, our current work  
310 with xenograft mouse models of IBC supports that LCN2 has a tumor promoter function in IBC  
311 tumors. We demonstrated that silencing of LCN2 reduced tumor initiation and growth, skin  
312 invasion/recurrence, and brain metastasis burden in preclinical mouse models of IBC.

313 We further reported that depletion of LCN2 in IBC cell cultures reduced features  
314 associated with aggressiveness in vitro, including migration, invasion, and cancer stem cell  
315 populations. Others have also found that reduction of LCN2 levels affected the same features in  
316 MDA-MB-231 cells (triple-negative breast cancer cell line) and in SK-BR-3 (HER2+ breast  
317 cancer cell line) [16, 25]. However, our data demonstrating higher levels of secreted LCN2 in  
318 IBC versus non-IBC cell lines and showing significant inhibition of key IBC tumor features such  
319 as tumor emboli/skin invasion in LCN2-silenced tumors suggest that LCN2 may exert its  
320 influence via an IBC-specific mechanism. The LCN2 protein has many functions, including  
321 transport of fatty acids and iron, induction of apoptosis, suppression of bacterial growth, and  
322 modulation of inflammatory responses [16, 17, 19-21, 25, 53]. In malignant cells, LCN2  
323 promotes oncogenesis through several mechanisms, including stabilization of MMP-9,  
324 sequestration of iron, induction of EMT, apoptosis resistance, and regulation of cell cycling [16,  
325 17, 19-21, 25, 53]. Here we report that LCN2 could regulate cell cycle-associated proteins such  
326 as FOXM1, Chk1, CDK1, Aurora-B, Wee1, and cyclin-B1 to promote its oncogenic role in IBC  
327 tumors. Others have also found that silencing of LCN2 affected the expression of cell cycle  
328 proteins by reducing cyclin-D1 and inducing p21, resulting in G0-G1 cell cycle arrest [22-24].

329 LCN2 is also a potential therapeutic target in cancer and other diseases. An antibody  
330 against LCN2 was found to decreased lung metastasis in a 4T1-induced aggressive mammary

331 tumor model [16]. In cervical cancer cells, treatment with LCN2-neutralizing antibody reduced  
332 the migration and invasion of cells that overexpressed LCN2 [54]. In other diseases, use of an  
333 anti-LCN2 neutralizing antibody showed reductions in reperfusion injury after stroke and  
334 attenuated skin lesions in a psoriasis mouse model [55, 56]. These findings suggest that LCN2  
335 could be an exploitable therapeutic target in IBC and other aggressive tumors. Further studies  
336 are needed to explore therapeutic strategies in IBC models by using antibodies against LCN2 or  
337 targeting LCN2-associated molecular pathways, including those involved in cell cycling.

338         In summary our studies provide evidence, for the first time, that LCN2 is highly  
339 upregulated in IBC tumors and that it is required for tumor growth and skin invasion in mouse  
340 models of IBC; our findings further suggest that LCN2 could be a therapeutic target for IBC and  
341 other aggressive cancers.

342

#### 343 **Declaration of competing interest**

344 We have no conflicts of interest to declare.

345

#### 346 **Acknowledgements**

347 We thank Christine F. Wogan, MS, ELS, of MD Anderson's Division of Radiation Oncology  
348 for scientific editing and review of the manuscript. The Functional Genomics Core Facility at UT  
349 MD Anderson Cancer Center and the Flow Cytometry and Cellular Imaging Core Facility are  
350 both funded through NCI grant P30 CA016672 to the University of Texas MD Anderson Cancer  
351 Center.

352

#### 353 **Funding**

354 This study was supported in part by the following grants: UPR/MDACC Partnership for  
355 Excellence in Cancer Research (U54CA096297-CA096300 to BGD), Susan G. Komen Career

356 Catalyst Research Grant (CCR16377813 to BGD), and State of Texas Morgan Welch Welch  
357 Inflammatory Breast Cancer Program.

358

### 359 **Contributions**

360 ESV and BGD conceived and designed the project, performed most of the experiments,  
361 analyzed the data, and interpreted the results. XH, RL, WB, SRS, and KG performed some  
362 experiments. PF, FB, CI, and XS helped with data analysis. JS provided statistical analysis  
363 support. SK provided pathological expertise and analysis of xenograft tumors. SVL, FB, GS, PV-  
364 M, NTU, WAW, and DT provided resources and contributed to revision of the manuscript. ESV  
365 and BGD wrote and edited the manuscript with input from all other authors.

366

### 367 **References**

- 368 [1] S. Chang, S.L. Parker, T. Pham, A.U. Buzdar, S.D. Hursting, Inflammatory breast carcinoma incidence  
369 and survival: the surveillance, epidemiology, and end results program of the National Cancer Institute,  
370 1975-1992, *Cancer*, 82 (1998) 2366-2372.
- 371 [2] K.W. Hance, W.F. Anderson, S.S. Devesa, H.A. Young, P.H. Levine, Trends in inflammatory breast  
372 carcinoma incidence and survival: the surveillance, epidemiology, and end results program at the  
373 National Cancer Institute, *J Natl Cancer Inst*, 97 (2005) 966-975.
- 374 [3] L.Y. Dirix, P. Van Dam, A. Prove, P.B. Vermeulen, Inflammatory breast cancer: current understanding,  
375 *Curr Opin Oncol*, 18 (2006) 563-571.
- 376 [4] F.M. Robertson, M. Bondy, W. Yang, H. Yamauchi, S. Wiggins, S. Kamrudin, S. Krishnamurthy, H. Le-  
377 Petross, L. Bidaut, A.N. Player, S.H. Barsky, W.A. Woodward, T. Buchholz, A. Lucci, N.T. Ueno, M.  
378 Cristofanilli, Inflammatory breast cancer: the disease, the biology, the treatment, *CA Cancer J Clin*, 60  
379 (2010) 351-375.
- 380 [5] Z. Wang, M. Chen, J. Pan, X. Wang, X.S. Chen, K.W. Shen, Pattern of distant metastases in  
381 inflammatory breast cancer - A large-cohort retrospective study, *J Cancer*, 11 (2020) 292-300.
- 382 [6] H.G. Abraham, Y. Xia, B. Mukherjee, S.D. Merajver, Incidence and survival of inflammatory breast  
383 cancer between 1973 and 2015 in the SEER database, *Breast Cancer Res Treat*, 185 (2021) 229-238.
- 384 [7] M. Cristofanilli, V. Valero, A.U. Buzdar, S.W. Kau, K.R. Broglio, A.M. Gonzalez-Angulo, N. Sneige, R.  
385 Islam, N.T. Ueno, T.A. Buchholz, S.E. Singletary, G.N. Hortobagyi, Inflammatory breast cancer (IBC) and  
386 patterns of recurrence: understanding the biology of a unique disease, *Cancer*, 110 (2007) 1436-1444.
- 387 [8] T.M. Fouad, T. Kogawa, D.D. Liu, Y. Shen, H. Masuda, R. El-Zein, W.A. Woodward, M. Chavez-  
388 MacGregor, R.H. Alvarez, B. Arun, A. Lucci, S. Krishnamurthy, G. Babiera, T.A. Buchholz, V. Valero, N.T.  
389 Ueno, Overall survival differences between patients with inflammatory and noninflammatory breast  
390 cancer presenting with distant metastasis at diagnosis, *Breast Cancer Res Treat*, 152 (2015) 407-416.
- 391 [9] S. Dawood, N.T. Ueno, V. Valero, W.A. Woodward, T.A. Buchholz, G.N. Hortobagyi, A.M. Gonzalez-  
392 Angulo, M. Cristofanilli, Differences in survival among women with stage III inflammatory and



- 393 noninflammatory locally advanced breast cancer appear early: a large population-based study, *Cancer*,  
394 117 (2011) 1819-1826.
- 395 [10] D. Zhang, T.A. LaFortune, S. Krishnamurthy, F.J. Esteva, M. Cristofanilli, P. Liu, A. Lucci, B. Singh, M.C.  
396 Hung, G.N. Hortobagyi, N.T. Ueno, Epidermal growth factor receptor tyrosine kinase inhibitor reverses  
397 mesenchymal to epithelial phenotype and inhibits metastasis in inflammatory breast cancer, *Clin Cancer*  
398 *Res*, 15 (2009) 6639-6648.
- 399 [11] C.G. Kleer, K.L. van Golen, T. Braun, S.D. Merajver, Persistent E-cadherin expression in inflammatory  
400 breast cancer, *Mod Pathol*, 14 (2001) 458-464.
- 401 [12] K.L. van Golen, Z.F. Wu, X.T. Qiao, L.W. Bao, S.D. Merajver, RhoC GTPase, a novel transforming  
402 oncogene for human mammary epithelial cells that partially recapitulates the inflammatory breast  
403 cancer phenotype, *Cancer Res*, 60 (2000) 5832-5838.
- 404 [13] R. Costa, C.A. Santa-Maria, G. Rossi, B.A. Carneiro, Y.K. Chae, W.J. Gradishar, F.J. Giles, M.  
405 Cristofanilli, Developmental therapeutics for inflammatory breast cancer: Biology and translational  
406 directions, *Oncotarget*, 8 (2017) 12417-12432.
- 407 [14] X. Wang, T. Semba, L.T.H. Phi, S. Chaitnikun, T. Iwase, B. Lim, N.T. Ueno, Targeting Signaling  
408 Pathways in Inflammatory Breast Cancer, *Cancers (Basel)*, 12 (2020).
- 409 [15] E.S. Villodre, Y. Gong, X. Hu, L. Huo, E.C. Yoon, N.T. Ueno, W.A. Woodward, D. Tripathy, J. Song, B.G.  
410 Debeb, NDRG1 Expression Is an Independent Prognostic Factor in Inflammatory Breast Cancer, *Cancers*  
411 *(Basel)*, 12 (2020).
- 412 [16] X. Leng, T. Ding, H. Lin, Y. Wang, L. Hu, J. Hu, B. Feig, W. Zhang, L. Pusztai, W.F. Symmans, Y. Wu,  
413 R.B. Arlinghaus, Inhibition of lipocalin 2 impairs breast tumorigenesis and metastasis, *Cancer Res*, 69  
414 (2009) 8579-8584.
- 415 [17] C.A. Fernandez, L. Yan, G. Louis, J. Yang, J.L. Kutok, M.A. Moses, The matrix metalloproteinase-  
416 9/neutrophil gelatinase-associated lipocalin complex plays a role in breast tumor growth and is present  
417 in the urine of breast cancer patients, *Clin Cancer Res*, 11 (2005) 5390-5395.
- 418 [18] J. Yang, M.A. Moses, Lipocalin 2: a multifaceted modulator of human cancer, *Cell Cycle*, 8 (2009)  
419 2347-2352.
- 420 [19] A. Iannetti, F. Pacifico, R. Acquaviva, A. Lavorgna, E. Crescenzi, C. Vascotto, G. Tell, A.M. Salzano, A.  
421 Scaloni, E. Vuttariello, G. Chiappetta, S. Formisano, A. Leonardi, The neutrophil gelatinase-associated  
422 lipocalin (NGAL), a NF-kappaB-regulated gene, is a survival factor for thyroid neoplastic cells, *Proc Natl*  
423 *Acad Sci U S A*, 105 (2008) 14058-14063.
- 424 [20] L. Leung, N. Radulovich, C.Q. Zhu, S. Organ, B. Bandarchi, M. Pintilie, C. To, D. Panchal, M.S. Tsao,  
425 Lipocalin2 promotes invasion, tumorigenicity and gemcitabine resistance in pancreatic ductal  
426 adenocarcinoma, *PLoS One*, 7 (2012) e46677.
- 427 [21] M. Shiiba, K. Saito, K. Fushimi, T. Ishigami, K. Shinozuka, D. Nakashima, Y. Kouzu, H. Koike, A.  
428 Kasamatsu, Y. Sakamoto, K. Ogawara, K. Uzawa, Y. Takiguchi, H. Tanzawa, Lipocalin-2 is associated with  
429 radioresistance in oral cancer and lung cancer cells, *Int J Oncol*, 42 (2013) 1197-1204.
- 430 [22] K.C. Chiang, T.S. Yeh, R.C. Wu, J.S. Pang, C.T. Cheng, S.Y. Wang, H.H. Juang, C.N. Yeh, Lipocalin 2  
431 (LCN2) is a promising target for cholangiocarcinoma treatment and bile LCN2 level is a potential  
432 cholangiocarcinoma diagnostic marker, *Sci Rep*, 6 (2016) 36138.
- 433 [23] M.C. Tung, S.C. Hsieh, S.F. Yang, C.W. Cheng, R.T. Tsai, S.C. Wang, M.H. Huang, Y.H. Hsieh,  
434 Knockdown of lipocalin-2 suppresses the growth and invasion of prostate cancer cells, *Prostate*, 73  
435 (2013) 1281-1290.
- 436 [24] J. Xu, S. Lv, W. Meng, F. Zuo, LCN2 Mediated by IL-17 Affects the Proliferation, Migration, Invasion  
437 and Cell Cycle of Gastric Cancer Cells by Targeting SLPI, *Cancer Manag Res*, 12 (2020) 12841-12849.
- 438 [25] J. Yang, D.R. Bielenberg, S.J. Rodig, R. Doiron, M.C. Clifton, A.L. Kung, R.K. Strong, D. Zurakowski,  
439 M.A. Moses, Lipocalin 2 promotes breast cancer progression, *Proc Natl Acad Sci U S A*, 106 (2009) 3913-  
440 3918.

- 441 [26] M. Jung, B. Oren, J. Mora, C. Mertens, S. Dziumbala, R. Popp, A. Weigert, N. Grossmann, I. Fleming, B.  
442 Brune, Lipocalin 2 from macrophages stimulated by tumor cell-derived sphingosine 1-phosphate  
443 promotes lymphangiogenesis and tumor metastasis, *Sci Signal*, 9 (2016) ra64.
- 444 [27] M. Bauer, J.C. Eickhoff, M.N. Gould, C. Mundhenke, N. Maass, A. Friedl, Neutrophil gelatinase-  
445 associated lipocalin (NGAL) is a predictor of poor prognosis in human primary breast cancer, *Breast*  
446 *Cancer Res Treat*, 108 (2008) 389-397.
- 447 [28] S. Candido, S.L. Abrams, L.S. Steelman, K. Lertpiriyapong, T.L. Fitzgerald, A.M. Martelli, L. Cocco, G.  
448 Montalto, M. Cervello, J. Polesel, M. Libra, J.A. McCubrey, Roles of NGAL and MMP-9 in the tumor  
449 microenvironment and sensitivity to targeted therapy, *Biochim Biophys Acta*, 1863 (2016) 438-448.
- 450 [29] B.G. Debeb, L. Lacerda, S. Anfossi, P. Diagaradjane, K. Chu, A. Bambhroliya, L. Huo, C. Wei, R.A.  
451 Larson, A.R. Wolfe, W. Xu, D.L. Smith, L. Li, C. Ivan, P.K. Allen, W. Wu, G.A. Calin, S. Krishnamurthy, X.H.  
452 Zhang, T.A. Buchholz, N.T. Ueno, J.M. Reuben, W.A. Woodward, miR-141-Mediated Regulation of Brain  
453 Metastasis From Breast Cancer, *J Natl Cancer Inst*, 108 (2016).
- 454 [30] A.H. Klopp, L. Lacerda, A. Gupta, B.G. Debeb, T. Solley, L. Li, E. Spaeth, W. Xu, X. Zhang, M.T. Lewis,  
455 J.M. Reuben, S. Krishnamurthy, M. Ferrari, R. Gaspar, T.A. Buchholz, M. Cristofanilli, F. Marini, M.  
456 Andreeff, W.A. Woodward, Mesenchymal stem cells promote mammosphere formation and decrease E-  
457 cadherin in normal and malignant breast cells, *PLoS One*, 5 (2010) e12180.
- 458 [31] A. Lachmann, A. Ma'ayan, KEA: kinase enrichment analysis, *Bioinformatics*, 25 (2009) 684-686.
- 459 [32] B.G. Debeb, L. Lacerda, W. Xu, R. Larson, T. Solley, R. Atkinson, E.P. Sulman, N.T. Ueno, S.  
460 Krishnamurthy, J.M. Reuben, T.A. Buchholz, W.A. Woodward, Histone deacetylase inhibitors stimulate  
461 dedifferentiation of human breast cancer cells through WNT/beta-catenin signaling, *Stem Cells*, 30  
462 (2012) 2366-2377.
- 463 [33] X. Hu, E.S. Villodre, W.A. Woodward, B.G. Debeb, Modeling Brain Metastasis Via Tail-Vein Injection  
464 of Inflammatory Breast Cancer Cells, *J Vis Exp*, (2021).
- 465 [34] S.J. Van Laere, N.T. Ueno, P. Finetti, P. Vermeulen, A. Lucci, F.M. Robertson, M. Marsan, T. Iwamoto,  
466 S. Krishnamurthy, H. Masuda, P. van Dam, W.A. Woodward, P. Viens, M. Cristofanilli, D. Birnbaum, L.  
467 Dirix, J.M. Reuben, F. Bertucci, Uncovering the molecular secrets of inflammatory breast cancer biology:  
468 an integrated analysis of three distinct affymetrix gene expression datasets, *Clin Cancer Res*, 19 (2013)  
469 4685-4696.
- 470 [35] F. Bertucci, P. Finetti, A. Goncalves, D. Birnbaum, The therapeutic response of ER+/HER2- breast  
471 cancers differs according to the molecular Basal or Luminal subtype, *NPJ Breast Cancer*, 6 (2020) 8.
- 472 [36] W.A. Woodward, S. Krishnamurthy, H. Yamauchi, R. El-Zein, D. Ogura, E. Kitadai, S. Niwa, M.  
473 Cristofanilli, P. Vermeulen, L. Dirix, P. Viens, S. van Laere, F. Bertucci, J.M. Reuben, N.T. Ueno, Genomic  
474 and expression analysis of microdissected inflammatory breast cancer, *Breast Cancer Res Treat*, 138  
475 (2013) 761-772.
- 476 [37] Y. Chi, J. Remsik, V. Kiseliovas, C. Derderian, U. Sener, M. Alghader, F. Saadeh, K. Nikishina, T. Bale,  
477 C. Iacobuzio-Donahue, T. Thomas, D. Pe'er, L. Mazutis, A. Boire, Cancer cells deploy lipocalin-2 to collect  
478 limiting iron in leptomeningeal metastasis, *Science*, 369 (2020) 276-282.
- 479 [38] E.S. Villodre, X. Hu, R. Larson, E.B. L., Y. Gong, L. Huo, J. Song, S. Krishnamurthy, N.K. Ibrahim, N.T.  
480 Ueno, D. Tripathy, W.A. Woodward, B.G. debeb, Ndr1-egfr axis in inflammatory breast cancer  
481 tumorigenesis and brain metastasis [abstract], In: *Proceedings of the 2019 San Antonio Breast Cancer*  
482 *Symposium; 2019 Dec 10-14; San Antonio, TX. Philadelphia (PA): AACR Cancer Res 80 (2020).*
- 483 [39] D.L. Smith, B.G. Debeb, H.D. Thames, W.A. Woodward, Computational Modeling of Micrometastatic  
484 Breast Cancer Radiation Dose Response, *Int J Radiat Oncol Biol Phys*, 96 (2016) 179-187.
- 485 [40] K. Fukumura, P.B. Malgulwar, G.M. Fischer, X. Hu, X. Mao, X. Song, S.D. Hernandez, X.H. Zhang, J.  
486 Zhang, E.R. Parra, D. Yu, B.G. Debeb, M.A. Davies, J.T. Huse, Multi-omic molecular profiling reveals  
487 potentially targetable abnormalities shared across multiple histologies of brain metastasis, *Acta*  
488 *Neuropathol*, 141 (2021) 303-321.

- 489 [41] S. Candido, R. Maestro, J. Polesel, A. Catania, F. Maira, S.S. Signorelli, J.A. McCubrey, M. Libra, Roles  
490 of neutrophil gelatinase-associated lipocalin (NGAL) in human cancer, *Oncotarget*, 5 (2014) 1576-1594.
- 491 [42] Z. Du, B. Wu, Q. Xia, Y. Zhao, L. Lin, Z. Cai, S. Wang, E. Li, L. Xu, Y. Li, H. Xu, D. Yin, LCN2-interacting  
492 proteins and their expression patterns in brain tumors, *Brain Res*, 1720 (2019) 146304.
- 493 [43] Z.P. Du, B.L. Wu, Y.M. Xie, Y.L. Zhang, L.D. Liao, F. Zhou, J.J. Xie, F.M. Zeng, X.E. Xu, W.K. Fang, E.M.  
494 Li, L.Y. Xu, Lipocalin 2 promotes the migration and invasion of esophageal squamous cell carcinoma cells  
495 through a novel positive feedback loop, *Biochim Biophys Acta*, 1853 (2015) 2240-2250.
- 496 [44] S.B. Gomez-Chou, A.K. Swidnicka-Siergiejko, N. Badi, M. Chavez-Tomar, G.B. Lesinski, T. Bekaii-Saab,  
497 M.R. Farren, T.A. Mace, C. Schmidt, Y. Liu, D. Deng, R.F. Hwang, L. Zhou, T. Moore, D. Chatterjee, H.  
498 Wang, X. Leng, R.B. Arlinghaus, C.D. Logsdon, Z. Cruz-Monserrate, Lipocalin-2 Promotes Pancreatic  
499 Ductal Adenocarcinoma by Regulating Inflammation in the Tumor Microenvironment, *Cancer Res*, 77  
500 (2017) 2647-2660.
- 501 [45] M. Miki, T. Oono, N. Fujimori, T. Takaoka, K. Kawabe, Y. Miyasaka, T. Ohtsuka, D. Saito, M.  
502 Nakamura, Y. Ohkawa, Y. Oda, M. Suyama, T. Ito, Y. Ogawa, CLEC3A, MMP7, and LCN2 as novel markers  
503 for predicting recurrence in resected G1 and G2 pancreatic neuroendocrine tumors, *Cancer Med*, 8  
504 (2019) 3748-3760.
- 505 [46] G.S. Santiago-Sanchez, V. Pita-Grisanti, B. Quinones-Diaz, K. Gumpfer, Z. Cruz-Monserrate, P.E.  
506 Vivas-Mejia, Biological Functions and Therapeutic Potential of Lipocalin 2 in Cancer, *Int J Mol Sci*, 21  
507 (2020).
- 508 [47] A. Viau, K. El Karoui, D. Laouari, M. Burtin, C. Nguyen, K. Mori, E. Pillebout, T. Berger, T.W. Mak, B.  
509 Knebelmann, G. Friedlander, J. Barasch, F. Terzi, Lipocalin 2 is essential for chronic kidney disease  
510 progression in mice and humans, *J Clin Invest*, 120 (2010) 4065-4076.
- 511 [48] A.S. Weners, K. Mehta, S. Loibl, H. Park, B. Mueller, N. Arnold, S. Hamann, J. Weimer, B. Ataseven,  
512 S. Darb-Esfahani, C. Schem, C. Mundhenke, F. Khandan, C. Thomssen, W. Jonat, H.J. Holzhausen, G. von  
513 Minckwitz, C. Denkert, M. Bauer, Neutrophil gelatinase-associated lipocalin (NGAL) predicts response to  
514 neoadjuvant chemotherapy and clinical outcome in primary human breast cancer, *PLoS One*, 7 (2012)  
515 e45826.
- 516 [49] S.P. Stoesz, A. Friedl, J.D. Haag, M.J. Lindstrom, G.M. Clark, M.N. Gould, Heterogeneous expression  
517 of the lipocalin NGAL in primary breast cancers, *Int J Cancer*, 79 (1998) 565-572.
- 518 [50] X. Provatopoulou, A. Gounaris, E. Kalogera, F. Zagouri, I. Flessas, E. Goussetis, A. Nonni, I.  
519 Papassotiriou, G. Zografos, Circulating levels of matrix metalloproteinase-9 (MMP-9), neutrophil  
520 gelatinase-associated lipocalin (NGAL) and their complex MMP-9/NGAL in breast cancer disease, *BMC*  
521 *Cancer*, 9 (2009) 390.
- 522 [51] T. Berger, C.C. Cheung, A.J. Elia, T.W. Mak, Disruption of the *Lcn2* gene in mice suppresses primary  
523 mammary tumor formation but does not decrease lung metastasis, *Proc Natl Acad Sci U S A*, 107 (2010)  
524 2995-3000.
- 525 [52] B. Oren, J. Urosevic, C. Mertens, J. Mora, M. Guiu, R.R. Gomis, A. Weigert, T. Schmid, S. Grein, B.  
526 Brune, M. Jung, Tumour stroma-derived lipocalin-2 promotes breast cancer metastasis, *J Pathol*, 239  
527 (2016) 274-285.
- 528 [53] C. Hu, K. Yang, M. Li, W. Huang, F. Zhang, H. Wang, Lipocalin 2: a potential therapeutic target for  
529 breast cancer metastasis, *Onco Targets Ther*, 11 (2018) 8099-8106.
- 530 [54] I.H. Chung, T.I. Wu, C.J. Liao, J.Y. Hu, Y.H. Lin, P.J. Tai, C.H. Lai, K.H. Lin, Overexpression of lipocalin 2  
531 in human cervical cancer enhances tumor invasion, *Oncotarget*, 7 (2016) 11113-11126.
- 532 [55] G. Wang, Y.C. Weng, I.C. Chiang, Y.T. Huang, Y.C. Liao, Y.C. Chen, C.Y. Kao, Y.L. Liu, T.H. Lee, W.H.  
533 Chou, Neutralization of Lipocalin-2 Diminishes Stroke-Reperfusion Injury, *Int J Mol Sci*, 21 (2020).
- 534 [56] S. Shao, T. Cao, L. Jin, B. Li, H. Fang, J. Zhang, Y. Zhang, J. Hu, G. Wang, Increased Lipocalin-2  
535 Contributes to the Pathogenesis of Psoriasis by Modulating Neutrophil Chemotaxis and Cytokine  
536 Secretion, *J Invest Dermatol*, 136 (2016) 1418-1428.

537

## 538 **Figure Legends**

539 **Fig. 1 LCN2 was highly expressed in tumors from patients with IBC. (A)** High *LCN2*

540 expression was associated with shorter overall survival in a meta-dataset of patients with non-

541 IBC. **(B-C)** *LCN2* mRNA expression was higher in tumors from IBC patients versus non-IBC

542 patients in two independent breast cancer datasets [34, 36]. **(D)** *LCN2* mRNA expression was

543 higher in estrogen receptor (ER)-negative compared to ER+ samples IBC samples. **(E)** *LCN2*

544 mRNA expression was higher in more aggressive molecular subtypes, ERBB2+ and triple-

545 negative breast cancer (TNBC) , compared to hormone receptor (HR)-positive/HERBB2-

546 negative subtype. **(F)** *LCN2*-high expression correlates with shorter overall survival in patients

547 with IBC. **(G)** *LCN2* mRNA expression was higher in IBC cell lines compared to non-IBC cell

548 lines. **(H-I)** *LCN2* protein expression was higher in IBC cell lines compared to non-IBC cell lines

549 shown by **(H)** immunoblotting or **(I)** ELISA for secreted *LCN2* in supernatants. Graphpad Prism

550 software was used to obtain the *p* values, with Mann-Whitney tests used to compare two

551 categories or one-way analysis of variance to compare three or more categories.

552

553 **Fig. 2 Silencing LCN2 decreased colony formation efficiency.** *LCN2* was knocked down

554 (sh*LCN2*) in two IBC cell lines (SUM149 and MDA-IBC3) and confirmed by **(A)** qRT-PCR and

555 **(B)** immunoblotting. **(C)** Secreted *LCN2* measured in control and silenced cells by ELISA at the

556 indicated times. **(D)** Proliferation was evaluated in control and *LCN2*-silenced SUM149 and

557 MDA-IBC3 cells with CellTiterBlue assay on the indicated days. **(E)** Cells were seeded in low

558 numbers to measure the capacity to form colonies in *LCN2* knockdown and control.

559

560 **Fig. 3. LCN2 knockdown reduced aggressiveness features in vitro. (A)** Migration and **(B)**

561 invasion by control cells (shCtl) and *LCN2*-knockdown (sh*LCN2*) SUM149 cells. **(C)** Primary

562 mammosphere formation efficiency and **(D)** secondary mammosphere formation efficiency. **(E)**  
563 CD44<sup>+</sup>CD24<sup>-</sup> cells (marker of cancer stem cells) were measured by flow cytometry.

564

565 **Fig. 4. Silencing LCN2 inhibited tumor growth and skin invasion. (A-C)** SUM149 shRNA Ctl  
566 or LCN2-knockdown (shLCN2) cells were transplanted orthotopically into the cleared mammary  
567 fat pad of SCID/Beige mice (n= 9/Ctl; 10/shLCN2) and tumor volume measured weekly; **(A)**  
568 tumor volume, **(B)** tumor latency, and **(C)** incidence of skin invasion/recurrence after resection  
569 of primary tumors. **(D-E)** Hematoxylin and eosin staining of primary tumors generated from  
570 LCN2 control and knockdown SUM149 cells. Both **(D)** skin invasion and **(E)** tumor emboli, two  
571 hallmarks of IBC, appeared only in the control-derived tumors (arrow head). Scale bar, 100  $\mu$ m.  
572 **(F)** Metastatic burden (area) of each brain metastasis formed was quantified by using ImageJ  
573 software. BM, brain metastasis. **(G)** Incidence of brain metastasis. N=10 mice per group.  
574 Fisher's exact test was used to obtain *p* values. **(H)** Top, green fluorescent protein (GFP)  
575 imaging of brain metastasis lesions generated from tail-vein injection of GFP-labeled MDA-IBC3  
576 shRNA Ctl or LCN2 knockdown cells, and bottom, hematoxylin and eosin stains of brain  
577 metastasis lesions. Scale bar, 50  $\mu$ m.

578

579 **Fig. 5. Silencing of LCN2 impairs cell cycle-associated proteins. (A)** The top proteins  
580 downregulated in LCN2-silenced cells compared with control cells after reverse phase protein  
581 array (RPPA) proteomic analysis. **(B)** Gene set enrichment analysis of RPPA data identified  
582 pathways that are enriched or downregulated in control vs. LCN2-silenced SUM149 cells. **(C)**  
583 STRING interaction network of predicted active kinases based on enrichment of kinase  
584 substrates and protein interactions identified using kinase enrichment analysis. The confidence  
585 of the interaction is reflected by the edge thickness. Based on node distribution analysis, four  
586 central proteins were identified (MAPK1, MAPK8, RPS6KB1 and MTOR).

587

588 **Table 1.** Clinico-pathological characteristics of tumor samples from patients with IBC or non-IBC  
589 according to *LCN2* expression.

590

591 **Table 2.** Univariate and multivariate Cox regression analysis of samples from 389 patients with  
592 inflammatory breast cancer (IBC) or non-IBC.

593

594 **Additional file 1. Figure S1.** *LCN2* expression is higher in sublines generated from brain  
595 metastasis (BrMS) than those generated from lung metastasis (LuMS). **(A)** Microarray analysis  
596 of sublines generated from BrMS or LuMS of SUM149 cells showed *LCN2* to be one of the top  
597 upregulated genes in BrMS (red arrow). Samples are described in Debeb 2016 [29]. **(B)** *LCN2*  
598 is secreted in higher levels in BrMS versus LuMS.

599

600 **Additional file 2. Supplementary Table 1.** Top kinases predicted to be activated based on  
601 kinase-substrate interactions of differentially phosphorylated proteins.

602

603 **Additional file 3. Supplementary Table 2.** Top kinases predicted to be activated based on  
604 kinase-substrate and protein-protein interaction analysis of differentially phosphorylated proteins  
605 across 10 different knowledge bases.

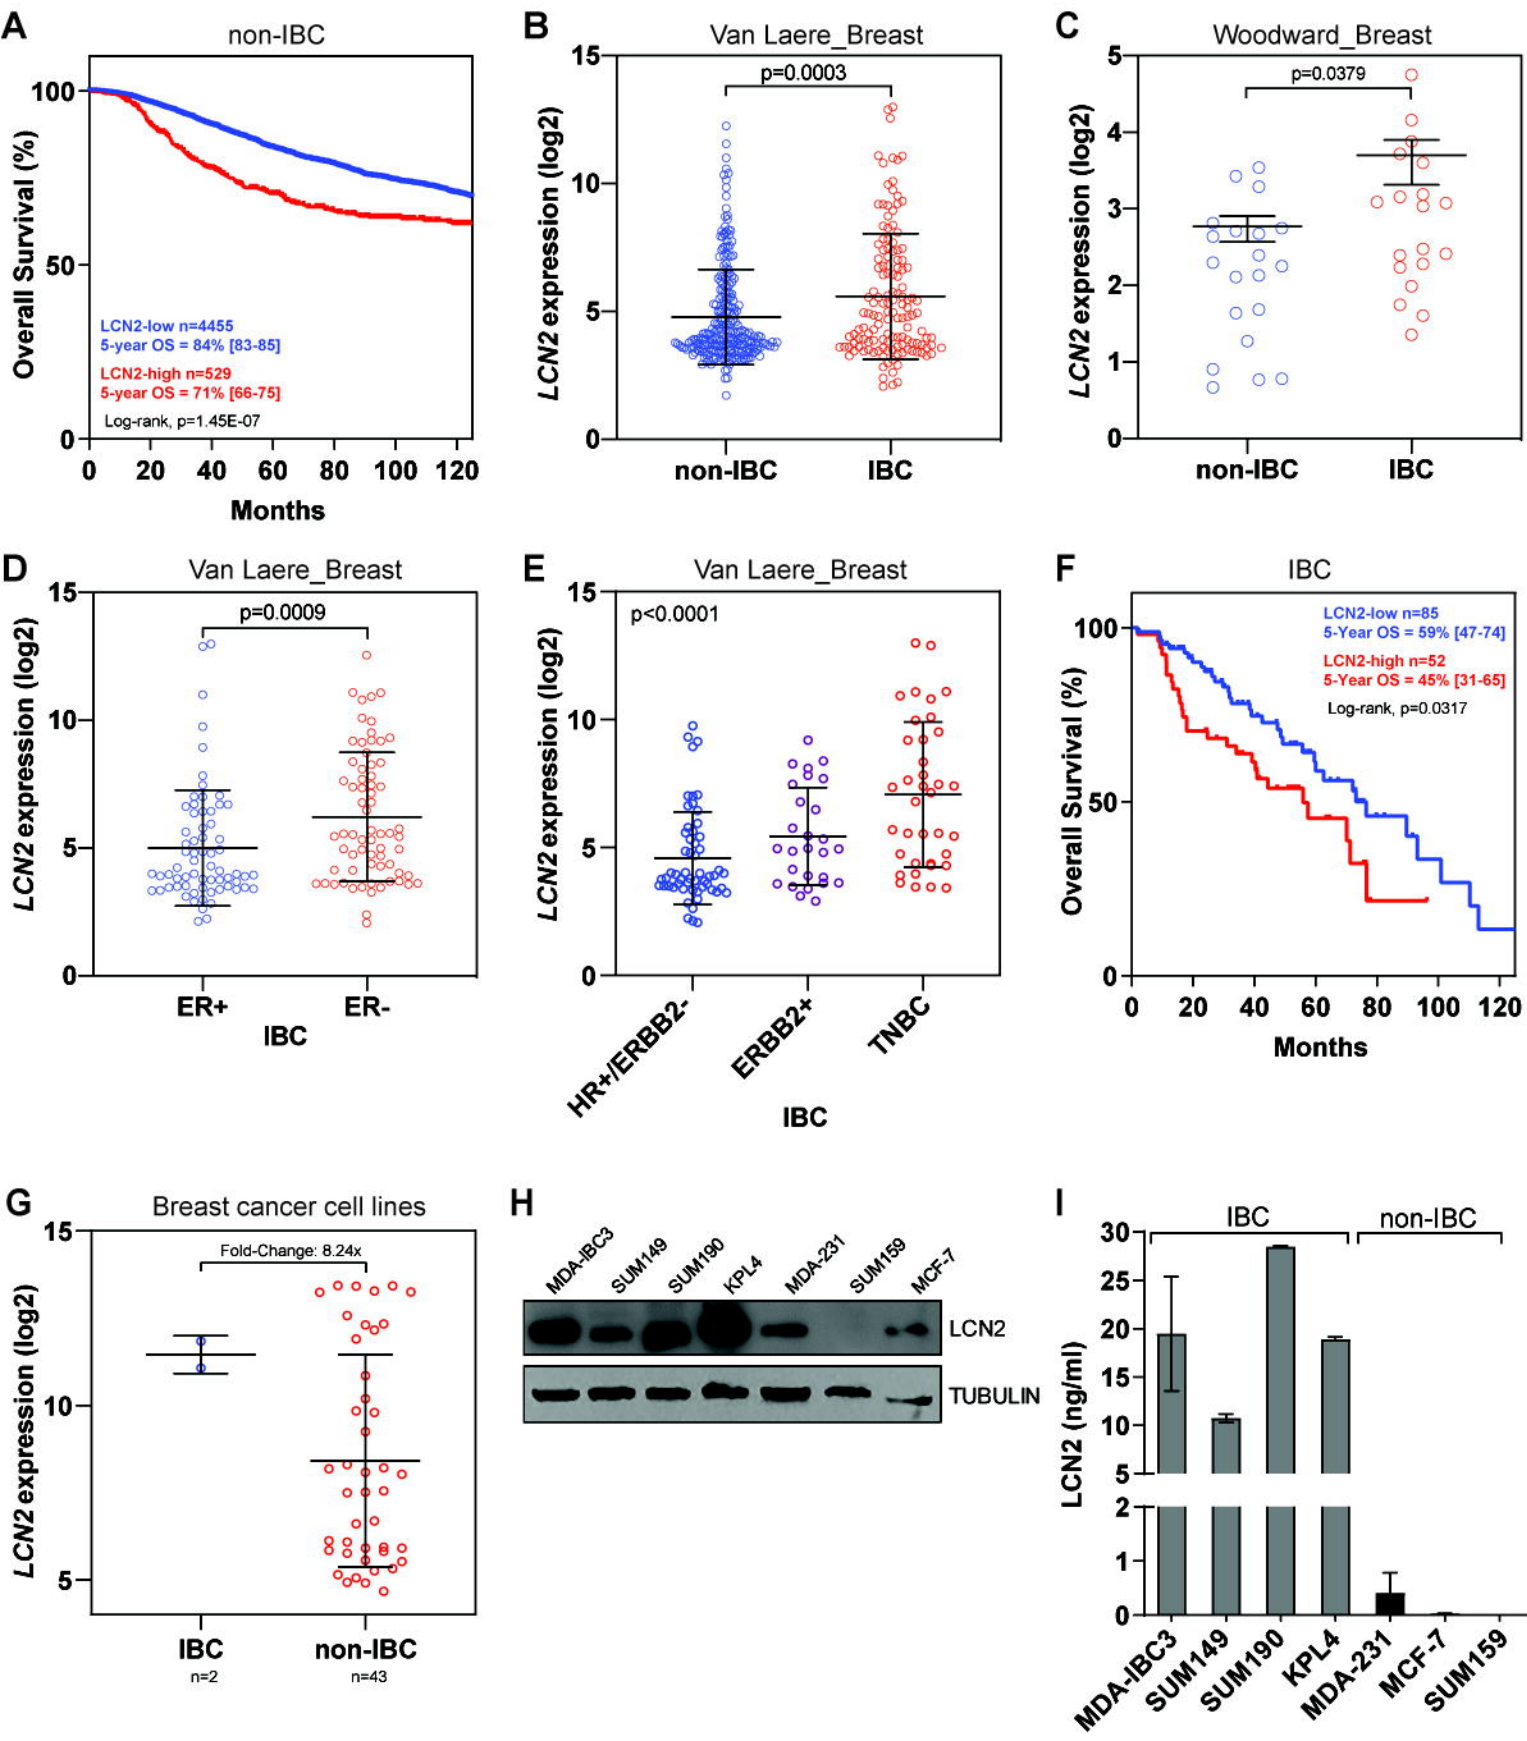

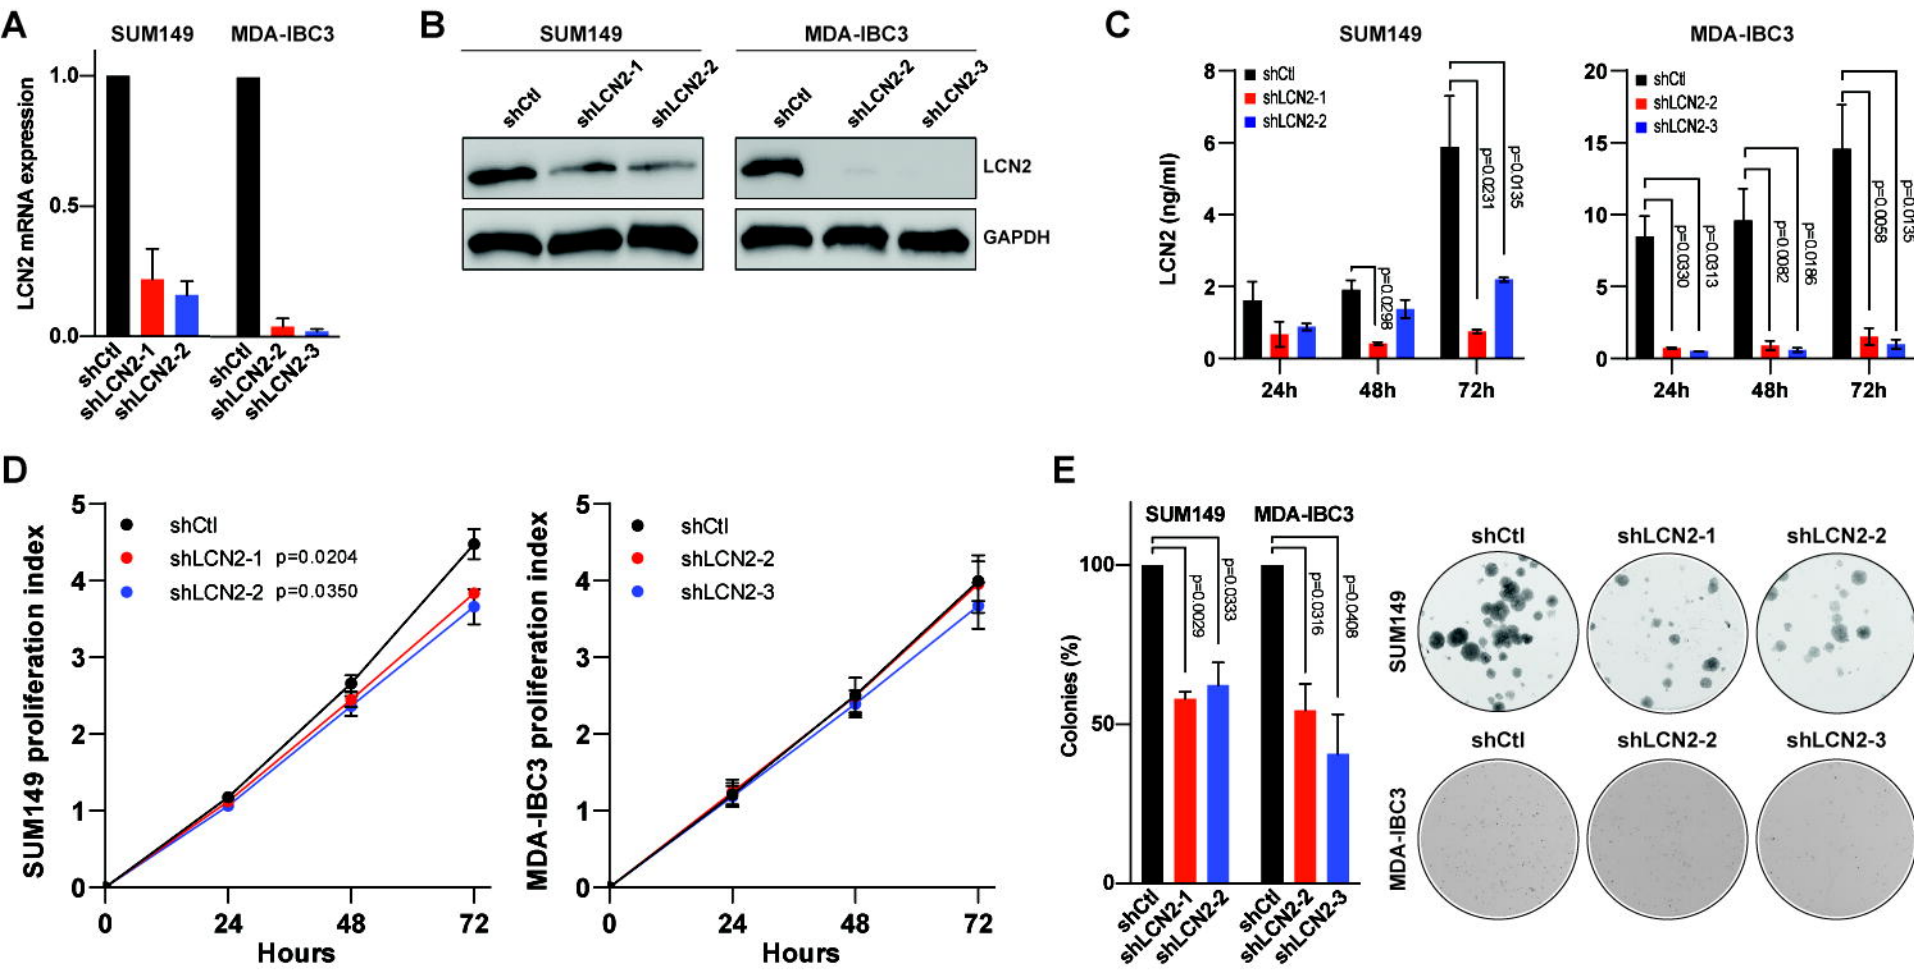



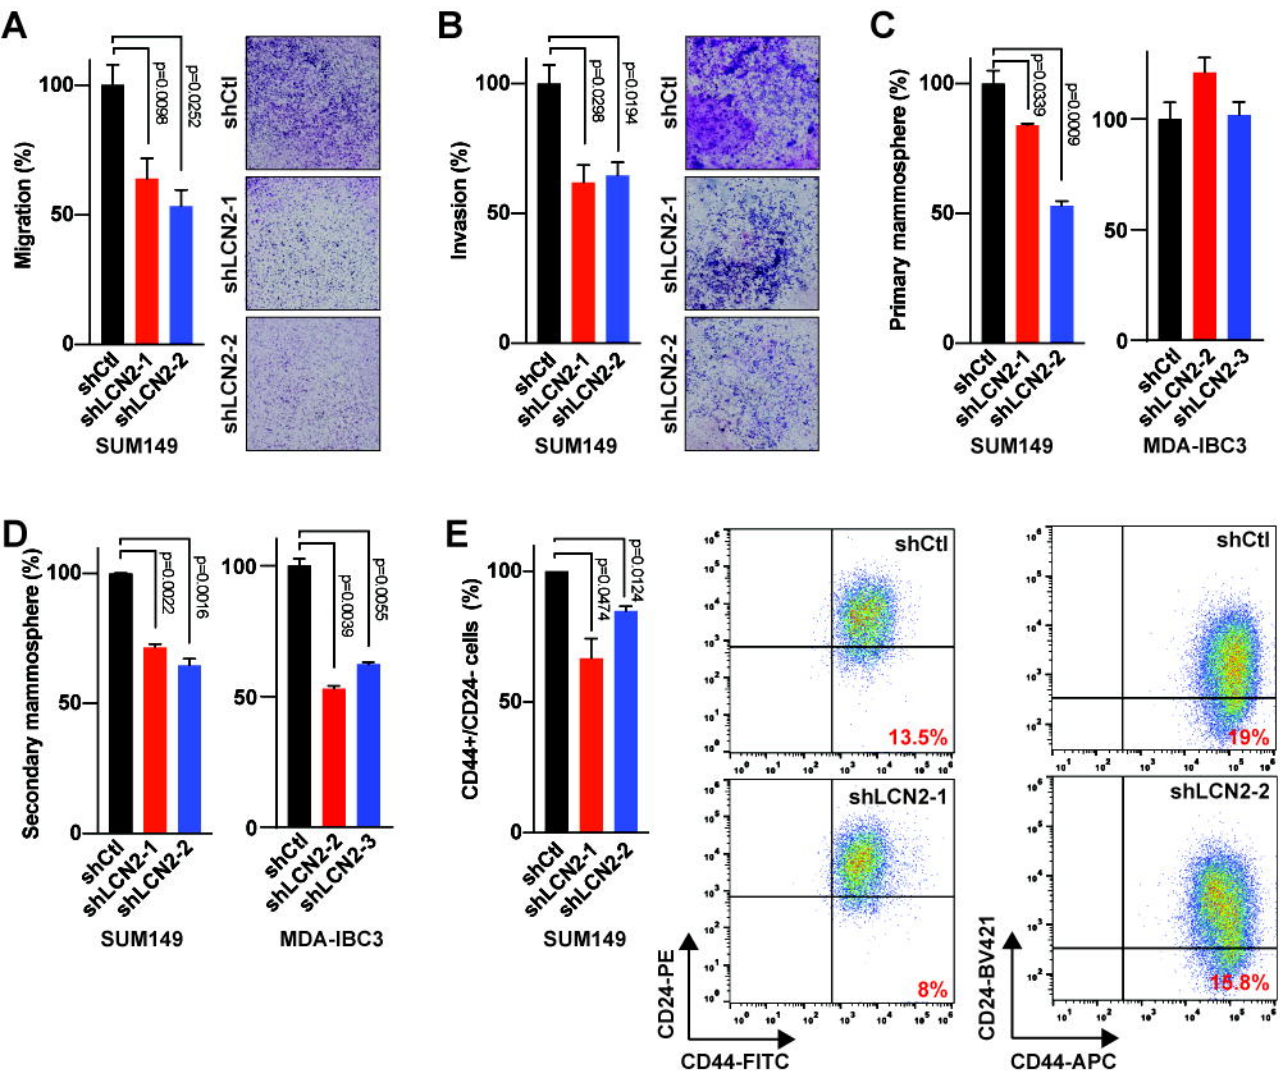

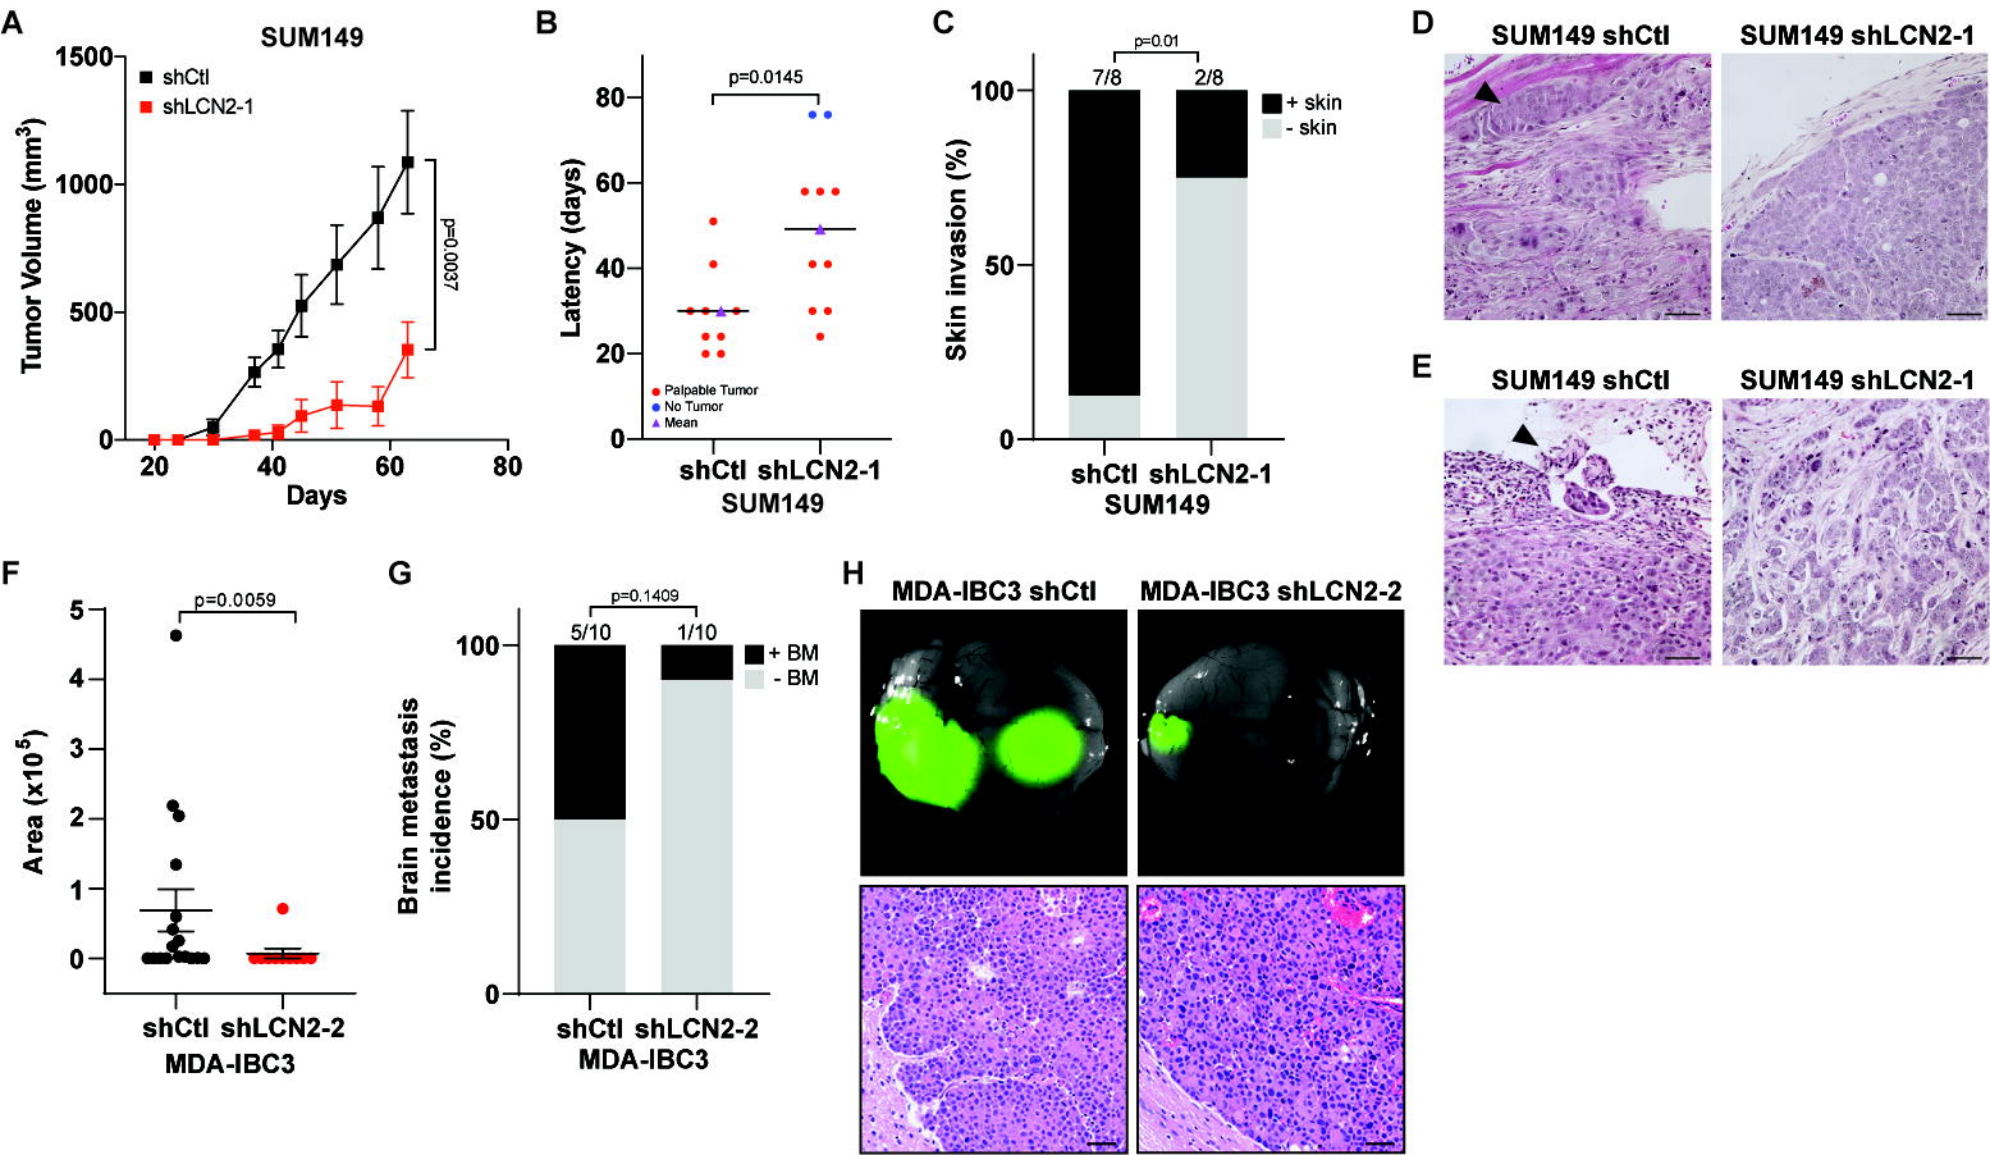

A

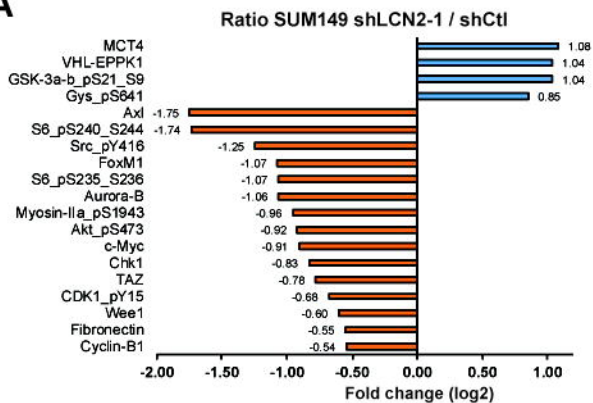

B

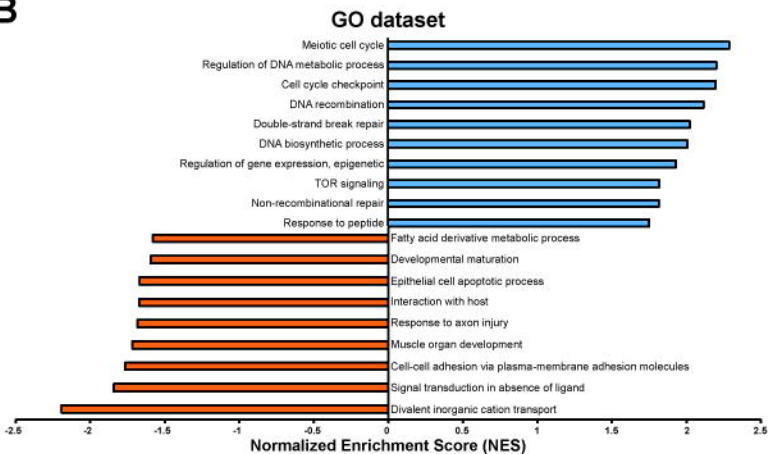

C

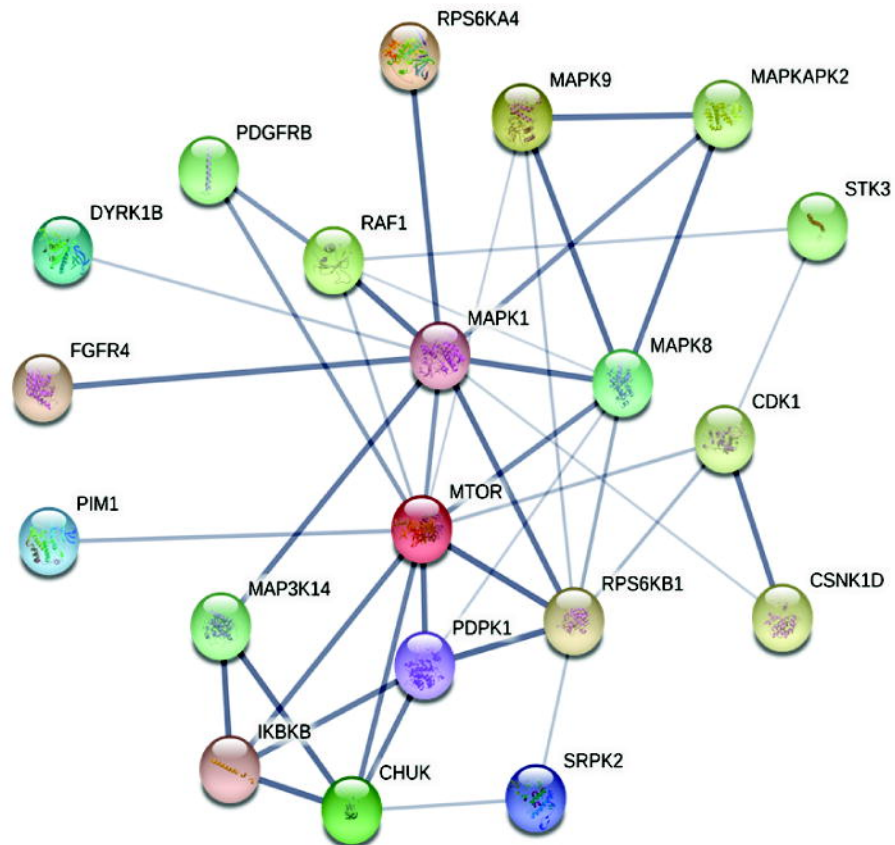

**Table 1**

Clinico-pathological characteristics of tumor samples from patients with inflammatory breast cancer (IBC) or non-IBC according to *LCN2* expression.

| Covariate                                       | Level      | N    | <i>LCN2</i> -low | <i>LCN2</i> -high               | <i>p</i> -value |
|-------------------------------------------------|------------|------|------------------|---------------------------------|-----------------|
| <b>Age (years)</b>                              | ≤50        | 2587 | 2218 (36%)       | 369 (42%)                       | 1.10E-04        |
|                                                 | >50        | 4520 | 4018 (64%)       | 502 (58%)                       |                 |
| <b>Pathological Grade</b>                       | 1          | 717  | 680 (13%)        | 37 (4%)                         | <1.00E-06       |
|                                                 | 2          | 2549 | 2359 (43%)       | 190 (22%)                       |                 |
|                                                 | 3          | 3016 | 2389 (44%)       | 627 (73%)                       |                 |
| <b>Pathological Node (pN)</b>                   | Negative   | 3666 | 3253 (57%)       | 413 (53%)                       | 3.89E-02        |
|                                                 | Positive   | 2788 | 2426 (43%)       | 362 (47%)                       |                 |
| <b>Pathological Size (pT)</b>                   | pT1        | 2116 | 1912 (38%)       | 204 (31%)                       | 2.00E-06        |
|                                                 | pT2        | 2931 | 2588 (52%)       | 343 (53%)                       |                 |
|                                                 | pT3        | 604  | 498 (10%)        | 106 (16%)                       |                 |
| <b>Pathological type</b>                        | Ductal     | 4027 | 3492 (78%)       | 535 (86%)                       | 3.00E-06        |
|                                                 | Lobular    | 500  | 471 (11%)        | 29 (5%)                         |                 |
|                                                 | Other      | 574  | 519 (12%)        | 55 (9%)                         |                 |
| <b>Estrogen Receptor status<sup>1</sup></b>     | Negative   | 2753 | 1955 (25%)       | 798 (71%)                       | 1.97E-215       |
|                                                 | Positive   | 6198 | 5875 (75%)       | 323 (29%)                       |                 |
| <b>Progesterone Receptor status<sup>1</sup></b> | Negative   | 4635 | 3746 (48%)       | 889 (80%)                       | 3.06E-86        |
|                                                 | Positive   | 4284 | 4055 (52%)       | 229 (20%)                       |                 |
| <b>ERBB2 status<sup>1</sup></b>                 | Negative   | 7862 | 6975 (89%)       | 887 (79%)                       | 2.37E-21        |
|                                                 | Positive   | 1089 | 855 (11%)        | 234 (21%)                       |                 |
| <b>Hormone Receptor subtype<sup>1</sup></b>     | HR+/ERBB2- | 5914 | 5598 (72%)       | 316 (28%)                       | <1.00E-06       |
|                                                 | ERBB2+     | 1089 | 855 (11%)        | 234 (21%)                       |                 |
|                                                 | TNBC       | 1938 | 1368 (17%)       | 570 (51%)                       |                 |
| <b>Overall Survival<sup>2</sup></b>             |            | 4984 | 1.00             | 1.58 [1.34 - 1.86] <sup>3</sup> | 3.31E-08        |

<sup>1</sup>mRNA status; <sup>2</sup>Univariate analysis; <sup>3</sup>hazard ratio (95% confidence interval)

Abbreviations: HR, hormone receptor; ERBB2, Erb-B2 Receptor Tyrosine Kinase 2 (HER2); TNBC, triple-negative breast cancer

**Table 2**

Univariate and multivariate Cox regression analysis of inflammatory breast cancer (IBC) patient samples versus non-IBC (n=389).

| IBC vs. non-IBC      | Univariate |             |          | Multivariate |             |          |
|----------------------|------------|-------------|----------|--------------|-------------|----------|
|                      | Odds-ratio | 95% CI      | p-value  | Odds-ratio   | 95% CI      | p-value  |
| LCN2, high vs low    | 2.09       | 1.43 - 3.06 | 1.43E-03 | 1.71         | 1.13 - 2.6  | 3.42E-02 |
| Molecular subtype    |            |             |          |              |             |          |
| ERBB2+ vs HR+/ERBB2- | 2.82       | 1.82 - 4.38 | 1.02E-04 | 2.5          | 1.59 - 3.93 | 8.16E-04 |
| TNBC vs HR+/ERBB2-   | 1.9        | 1.22 - 2.97 | 1.69E-02 | 1.51         | 0.93 - 2.44 | 0.162    |

Abbreviations: HR, hormone receptor; ERBB2, Erb-B2 Receptor Tyrosine Kinase 2 (HER2); TNBC, triple-negative breast cancer
